# Supplementary material
Source: publisher site journal article supplement (https://www.dovepress.com/get_supplementary_file.php?f=449891.docx)
Supplement: Supplementary file 1 [file get_supplementary_file.php]

Supplementary materials：Pubmed retrieval strategy

#1 "colorectal neoplasms"[MeSH Major Topic] OR "neoplasm colorectal"[Title/Abstract] OR "neoplasms colorectal"[Title/Abstract] OR "colorectaltumors"[Title/Abstract] OR "colorectal tumor"[Title/Abstract] OR "tumor colorectal"[Title/Abstract] OR "tumors colorectal"[Title/Abstract]OR "colorectal cancer"[Title/Abstract] OR "cancer colorectal"[Title/Abstract] OR "cancers colorectal"[Title/Abstract] OR "colorectal cancers"[Title/Abstract] OR "colorectal carcinoma"[Title/Abstract] OR "carcinoma colorectal"[Title/Abstract] OR "carcinomas colorectal"[Title/Abstract] OR "colorectal carcinomas"[Title/Abstract] OR "colonic neoplasms"[Title/Abstract] OR "rectal neoplasms"[Title/Abstract]

245,749

#2 "general surgery"[MeSH Major Topic] OR "Postoperative"[Title/Abstract] OR "surgery"[Title/Abstract] OR "operative treatment"[Title/Abstract] OR "operation"[Title/Abstract] OR "postoperation"[Title/Abstract] OR "after operation"[Title/Abstract] OR "radical resection"[Title/Abstract] OR "radical surgery"[Title/Abstract] OR "radical operation"[Title/Abstract] OR (("modifiable"[All Fields] OR "modified"[All Fields] OR "modifier"[All Fields] OR "modifiers"[All Fields] OR "modifies"[All Fields] OR "modify"[All Fields] OR "modifying"[All Fields]) AND "radical correction"[Title/Abstract]) 2,010,622

#3 "gastrointestinal motility"[MeSH Major Topic] OR "gastrointestinal motilities"[Title/Abstract] OR (("cell movement"[MeSH Terms] OR ("cell"[All Fields] AND "movement"[All Fields]) OR "cell movement"[All Fields] OR "Motility"[All Fields] OR "motile"[All Fields] OR "motiles"[All Fields] OR "Motilities"[All Fields]) AND "Gastrointestina"[Title/Abstract]) OR "motility gastrointestinal"[Title/Abstract] OR "intestinal motility"[Title/Abstract] OR "intestinal motilities"[Title/Abstract] OR (("cell movement"[MeSH Terms] OR ("cell"[All Fields] AND "movement"[All Fields]) OR "cell movement"[All Fields] OR "Motility"[AllFields] OR "motile"[All Fields] OR "motiles"[All Fields] OR"Motilities"[All Fields]) AND "Intestinal"[Title/Abstract]) OR"motility intestinal"[Title/Abstract] OR "gastrointestinal motilities"[Title/Abstract] OR (("cell movement"[MeSH Terms] OR("cell"[All Fields] AND "movement"[All Fields]) OR "cell movement"[All Fields] OR "Motility"[All Fields] OR "motile"[All Fields]OR "motiles"[All Fields] OR "Motilities"[All Fields]) AND "Gastrointestinal"[Title/Abstract]) OR "motility gastrointestinal"[Title/Abstract] OR "intestinal motility"[Title/Abstract] OR "intestinal motilities"[Title/Abstract] OR (("cell movement"[ MeSH Terms] OR ("cell"[All Fields] AND "movement"[All Fields]) OR "cell movement"[All Fields] OR "Motility"[All Fields] OR " motile"[All Fields] OR "motiles"[All Fields] OR "Motilities"[All Fields]) AND "Intestinal"[Title/Abstract]) OR "motility in-testinal"[Title/Abstract] OR "gastrointestinal tracts"[Title/Abstract] 39,482

#4 "nursing care"[MeSH Major Topic] OR "nurse"[Title/Abstract] OR "nursing"[Title/Abstract] OR "care"[Title/Abstract] 2,041,704

#5 #1 AND #2 AND #3 AND #4 Filters:Established until January 11, 2023

14
